# Supplementary material for: Genetic Analysis of Novel Fertility Restoration Genes (qRf3 and qRf6) in Dongxiang Wild Rice Using GradedPool-Seq Mapping and QTL-Seq Correlation Analysis
Source: MDPI journal article supplement (doi:10.3390/ijms241914832), 2023-10-02
Supplement: s1 [file s1]

**Table S4.** Genotype number statistics of each sample

| <b>Sample</b> | <b>count</b> | <b>SNP count</b> | <b>Hom AA count</b> | <b>Het RA count</b> | <b>Hom RR count</b> |
|---------------|--------------|------------------|---------------------|---------------------|---------------------|
| DB11A-L       | 3,721,415    | 3,482,583        | 1,807,153           | 1,675,430           | 238,832             |
| DB11A-M       | 3,739,132    | 3,506,071        | 1,785,665           | 1,720,406           | 233,061             |
| DB11A-H       | 3,748,286    | 3,539,552        | 1,787,332           | 1,752,220           | 208,734             |
| XB            | 3,015,680    | 2,513,461        | 502,219             | 506,067             | 3,015,680           |
