# Supplementary material for: Genetic Analysis of Novel Fertility Restoration Genes (qRf3 and qRf6) in Dongxiang Wild Rice Using GradedPool-Seq Mapping and QTL-Seq Correlation Analysis
Source: MDPI journal article supplement (doi:10.3390/ijms241914832), 2023-10-02
Supplement: s1 [file s1]

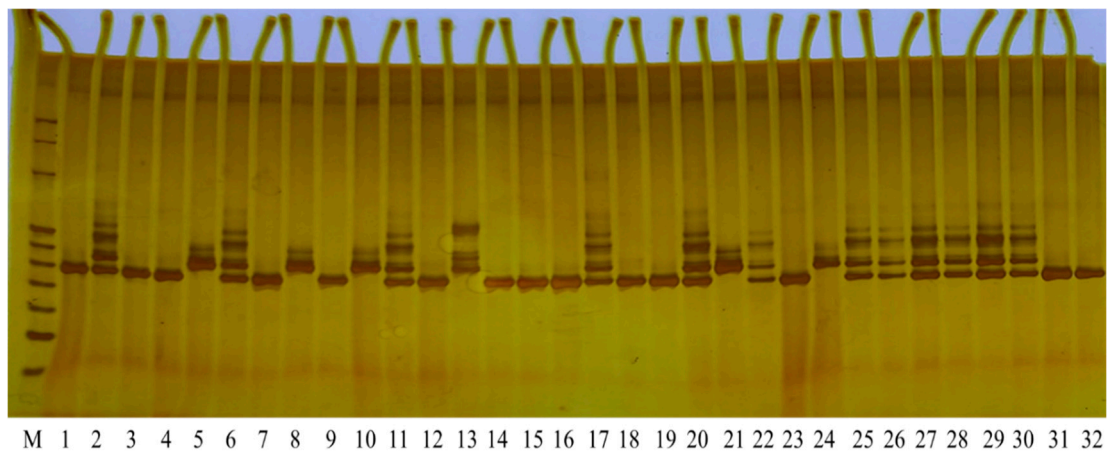

M 1 2 3 4 5 6 7 8 9 10 11 12 13 14 15 16 17 18 19 20 21 22 23 24 25 26 27 28 29 30 31 32

**Figure S2.** Segregation of marker RM17 in the XDX-BIL population. Note: M: 20bp DNA Ladder; 1: XB; 2-32: BIL individuals.
