# Supplementary material for: Genetic Analysis of Novel Fertility Restoration Genes (qRf3 and qRf6) in Dongxiang Wild Rice Using GradedPool-Seq Mapping and QTL-Seq Correlation Analysis
Source: MDPI journal article supplement (doi:10.3390/ijms241914832), 2023-10-02
Supplement: s1 [file s1]

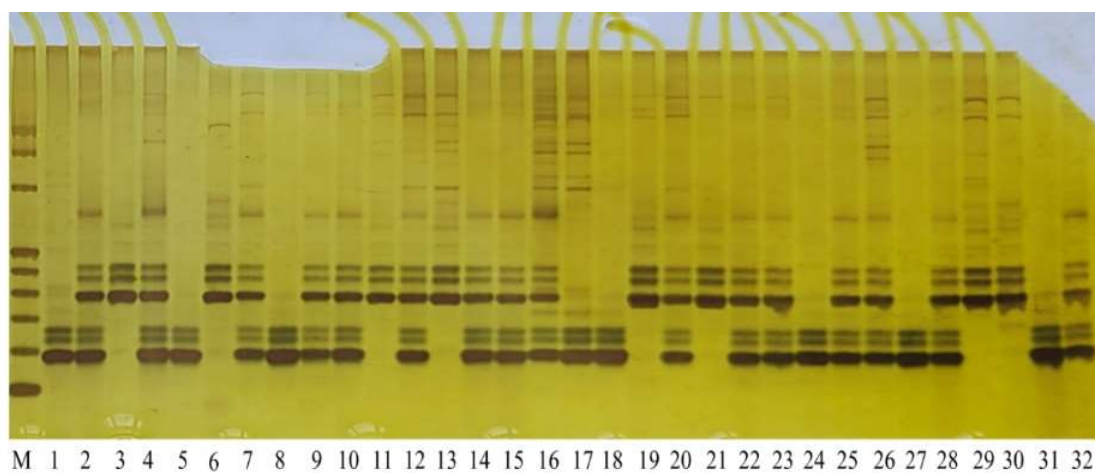

**Figure S3.** Segregation of marker RM340 in the XDX-BIL population. Note: M: 20bp DNA Ladder; 1: Dongxiang Wild Rice; 2-32: BIL individuals
