# Supplementary material for: Genetic Analysis of Novel Fertility Restoration Genes (qRf3 and qRf6) in Dongxiang Wild Rice Using GradedPool-Seq Mapping and QTL-Seq Correlation Analysis
Source: MDPI journal article supplement (doi:10.3390/ijms241914832), 2023-10-02
Supplement: s1 [file s1]

Table S1 Correlation analysis of spikelet fertility between testcross populations

| Cross-testing groups                | 19Z9A/XDX-BIL | 20Z9A/XDX-BIL | Two-year average bearing rate | DB11A/XDX-BIL |
|-------------------------------------|---------------|---------------|-------------------------------|---------------|
| 19Z9A/XDX-BIL                       | 1             | 0.750**       | 0.934**                       | 0.188         |
| 20Z9A/XDX-BIL                       |               | 1             | 0.943**                       | 0.321*        |
| The two-year average fertility rate |               |               | 1                             | 0.274*        |
| DB11A/XDX-BIL                       |               |               |                               | 1             |

Note: \*, \*\* significant at 0.05 and 0.01 level, respectively.
