# Supplementary material for: Genetic Analysis of Novel Fertility Restoration Genes (qRf3 and qRf6) in Dongxiang Wild Rice Using GradedPool-Seq Mapping and QTL-Seq Correlation Analysis
Source: MDPI journal article supplement (doi:10.3390/ijms241914832), 2023-10-02
Supplement: s1 [file s1]

Table S2. Results of sequencing data contamination test

| Sample  | Top1 species (comparison rate)      | Top2 species (comparison rate)        |
|---------|-------------------------------------|---------------------------------------|
| DB11A-H | <i>Oryza sativa</i> Indica (80.92%) | <i>Oryza sativa</i> Japonica (10.47%) |
| DB11A-L | <i>Oryza sativa</i> Indica (81.37%) | <i>Oryza sativa</i> Japonica (10.79%) |
| DB11A-M | <i>Oryza sativa</i> Indica (81.23%) | <i>Oryza sativa</i> Japonica (10.53%) |
| XB      | <i>Oryza sativa</i> Indica (84.93%) | <i>Oryza sativa</i> Japonica (6.74%)  |
