# Supplementary material for: Genetic Analysis of Novel Fertility Restoration Genes (qRf3 and qRf6) in Dongxiang Wild Rice Using GradedPool-Seq Mapping and QTL-Seq Correlation Analysis
Source: MDPI journal article supplement (doi:10.3390/ijms241914832), 2023-10-02
Supplement: s1 [file s1]

**Table S3.** Result of genome comparison with Nipponbare

| <b>Sample</b> | <b>Mapped Reads Ratio</b> | <b>Coverage</b> | <b>Depth</b> |
|---------------|---------------------------|-----------------|--------------|
| DB11A-L       | 98.00%                    | 96.16%          | 106          |
| DB11A-M       | 98.46%                    | 96.67%          | 129          |
| DB11A-H       | 98.01%                    | 96.99%          | 118          |
| XB            | 98.28%                    | 92.10%          | 29           |
