# Supplementary material for: Genetic Analysis of Novel Fertility Restoration Genes (qRf3 and qRf6) in Dongxiang Wild Rice Using GradedPool-Seq Mapping and QTL-Seq Correlation Analysis
Source: MDPI journal article supplement (doi:10.3390/ijms241914832), 2023-10-02
Supplement: s1 [file s1]

**Table S5.** SSR molecular marker details table.

| <b>Chromosome</b> | <b>Marker name</b> | <b>Physical location</b> | <b>Primer forward(5'→3')</b> | <b>Primer reverse(3'→5')</b> |
|-------------------|--------------------|--------------------------|------------------------------|------------------------------|
| Chr.1             | RM10049            | 746,085                  | attgacaattgtgaagcgagaaaaggg  | cctccagggtcttcgaccgccagt     |
| Chr.1             | RM10116            | 2,169,138                | atcccacttgacagacgtagg        | acagcagcaaggtgcctc           |
| Chr.1             | RM10176            | 3,637,718                | agcaccatcagctcagctactcc      | gaaggcttctgtcaagacgatcc      |
| Chr.1             | RM243              | 7,970,722                | gatctgcagactgcagttgc         | agctgcaacgatgtgtcc           |
| Chr.1             | RM1151             | 8,577,052                | gaccgcaaaagatcatcgac         | gtaacagcgaccgttggtg          |
| Chr.1             | RM6466             | 9,191,088                | cgaacgagaactccctcatg         | attgcaccaaggagatcg           |
| Chr.1             | RM23               | 10,705,594               | cattggagtggaggctgg           | gtcaggcttctgccattctc         |
| Chr.1             | RM140              | 12,300,716               | tgcctcttccctggctcccctg       | ggcatgccgaatgaaatgcatg       |
| Chr.1             | RM129              | 19,008,692               | tctctcggagccaaggcgagg        | cgagccacgacgcgatgtacc        |
| Chr.1             | RM3475             | 26,041,024               | gtcggtttgctagttagc           | ttctcgggtgatgggtctc          |
| Chr.1             | RM246              | 27,335,176               | gagctccatcagccattcag         | ctgagtgtgtgctgcgact          |
| Chr.1             | RM297              | 32,099,566               | tctttggaggcgagctgag          | cgaagggtacatctgcttag         |
| Chr.1             | RM212              | 33,053,493               | ccactttcagctactaccag         | caccatttgtctctcattatg        |
| Chr.1             | RM315              | 36,734,135               | gaggtacttctccgtttcac         | agtcagctcactgtgcagtg         |
| Chr.1             | RM12208            | 41,941,608               | gggaggcatgtagatgcagagc       | ctccaatggtgaaatcgaatgg       |
| Chr.2             | RM154              | 1,083,820                | gacggtgacgcactttatgaacc      | cgatctgcgagaaacctctcc        |
| Chr.2             | RM1285             | 3,837,901                | tctccagggaacagggtacac        | gtggtacaatgtgcagtggc         |
| Chr.2             | RM3294             | 5,204,941                | ttacacacactacggacgag         | cctggtggtacctctcttaatc       |
| Chr.2             | RM5780             | 5,453,144                | gctgctgcacttctactgc          | acgcacatgcctaagcctag         |
| Chr.2             | RM71               | 8,760,433                | ctagaggcgaaaacgagatg         | gggtgggcgaggttaataatg        |
| Chr.2             | RM29               | 16,575,205               | cagggaccacctgtcatc           | aacgttggtcatatcggtgg         |
| Chr.2             | RM475              | 20,399,319               | cctcacgatttctccaac           | acggtgggattagactgtgc         |
| Chr.2             | RM262              | 20,794,972               | cattccgtctcggtcaact          | cagagcaaggtggcttgc           |
| Chr.2             | RM6                | 29,579,845               | gtccctccaccaattc             | tcgtctactgttggtgcac          |
| Chr.2             | RM213              | 34,652,316               | atctgtttgcaggggacaag         | aggtctagacgatgtcgtga         |
| Chr.2             | RM208              | 35,135,783               | tctgcaagccttgtctgatg         | taagtcatcattgtgtggacc        |
| Chr.2             | RM138              | 35,674,147               | agcgcaacaaccaatccatccg       | aagaagctgcctttgacgctatgg     |
| Chr.3             | RM22               | 1,519,587                | ggtttgggagcccataatct         | ctgggcttcttctactcgtc         |
| Chr.3             | RM569              | 1,888,272                | gacattctcgcttgcctc           | tgccccctctaaaacctcc          |
| Chr.3             | RM4352             | 4,313,896                | gttgttcaccatagtcaga          | atacattcatgaaacctgcc         |
| Chr.3             | RM545              | 4,947,911                | caatggcagagacccaaaag         | ctggcatgtaacgacagtgg         |
| Chr.3             | RM14586            | 5,987,554                | gggtgtgagccaagaactgacc       | cctcaaggaaatcctcgtaagtgcg    |

|       |         |            |                          |                         |
|-------|---------|------------|--------------------------|-------------------------|
| Chr.3 | RM1324  | 6,036,117  | tgttgatcccttgataggg      | agcaagatcagctagctgcc    |
| Chr.3 | RM232   | 9,734,810  | ccggtatccttcgatattgc     | ccgacttttctcctgacg      |
| Chr.3 | RM251   | 9,928,907  | gaatggcaatggcgctag       | atgcggttcaagattcgatc    |
| Chr.3 | RM282   | 12,407,382 | ctgtgtcgaaaggctgcac      | cagtctctgtttgcagcaag    |
| Chr.3 | RM16    | 23,126,064 | cgctagggcagcatctaaa      | aacacagcaggtacgcgc      |
| Chr.3 | RM15759 | 28,314,615 | caggatcggacaggatcacagg   | gctcctggcgagctatagacc   |
| Chr.3 | RM85    | 36,348,226 | ccaaagatgaaacctggattg    | gcacaaggtgagcagtc       |
| Chr.4 | RM335   | 688,353    | gtacacacccacatcgagaag    | gctctatgcgagtatccatgg   |
| Chr.4 | RM518   | 2,030,135  | ctttcactcactcacatgg      | atccatctggagcaagcaac    |
| Chr.4 | RM307   | 13,126,513 | gtactaccgacctaccgttac    | ctgctatgatgaactgctc     |
| Chr.4 | RM401   | 13,154,172 | tggaacagatagggtgtaaggg   | ccgttcacaacactatacaagc  |
| Chr.4 | RM6314  | 18,444,943 | gattcgtgtcggttgtcaag     | gggtcagggacgaattcag     |
| Chr.4 | RM471   | 18,824,746 | acgcacaagcagatgatgag     | gggagaagacgaatgtttgc    |
| Chr.4 | RM273   | 24,044,220 | gaagccgtcgtgaagtacc      | gtttcctacctgatcgcgac    |
| Chr.4 | RM241   | 26,857,374 | gagccaaataagatcgctga     | tgcaagcagcagatttagtg    |
| Chr.4 | RM280   | 34,989,558 | acacgatccactttgcgc       | tgtgtcttgagcagccagg     |
| Chr.5 | RM153   | 189,782    | gcctcgagcatcatcatcag     | atcaacctgcacttcctgg     |
| Chr.5 | RM13    | 1,989,212  | tccaacatggcaagagagag     | gggtggcattcgattccag     |
| Chr.5 | RM267   | 2,881,317  | tgcagacatagagaaggaagtg   | agcaacagcacaacttgatg    |
| Chr.5 | RM289   | 7,807,745  | ttcatggcacacaagcc        | ctgtgcacgaactccaaag     |
| Chr.5 | RM249   | 10,776,494 | ggcgtaaagggtttgcatgt     | atgatccatgaaggtcagc     |
| Chr.5 | RM509   | 16,324,561 | tagtgaggagtggaacgg       | atcgtecccaaatctcatc     |
| Chr.5 | RM164   | 19,196,472 | tcttgccgctcactgcagatatcc | gcagccctaatgtacaattcttc |
| Chr.5 | RM3870  | 22,900,326 | tacatctccggcggtttacac    | ccaaggttgaacaggaagc     |
| Chr.5 | RM18851 | 23,154,908 | gcatcggtcaggtgatttacc    | ggacgagttagtaagcacgatgg |
| Chr.5 | RM274   | 26,848,154 | cctcgcttatgagagcttcg     | cttctccatcactcccatgg    |
| Chr.5 | RM87    | 27,104,235 | cctctccgatacacccgtatg    | gcgaaggtacgaaaggaaag    |
| Chr.5 | RM334   | 28,547,534 | gttcagtggtcagtgccacc     | gactttgatctttggtggacg   |
| Chr.6 | RM508   | 441,616    | ggatagatcatgtgtggggg     | acccgtgaaccacaaagaac    |
| Chr.6 | RM3805  | 2,853,061  | agaggaagaagccaaggagg     | catcaacgtaccaaccatgg    |
| Chr.6 | RM204   | 3,168,314  | gtgactgacttggtcataggg    | gtagccatgctctcgtacc     |
| Chr.6 | RM225   | 3,416,533  | tgcccatatggtctggatg      | gaaagtggtatcaggaaggc    |
| Chr.6 | RM314   | 4,878,802  | ctagcaggaactccttcagg     | aacattccacacacacgc      |
| Chr.6 | RM111   | 5,096,744  | cacaaccttgagcaccgggtc    | acgcctgcagttgatccagg    |
| Chr.6 | RM253   | 5,425,408  | tcctcaagagtgcaaaacc      | gcattgtcatgtcgaagcc     |

|        |         |            |                           |                            |
|--------|---------|------------|---------------------------|----------------------------|
| Chr.6  | RM276   | 6,230,045  | ctcaacgttgacacctcgtg      | tcctccatcgagcagtatca       |
| Chr.6  | RM7551  | 20,948,206 | tcacctcctctgccatctc       | ctaactcacctccagcctgc       |
| Chr.6  | RM20361 | 24,099,497 | cttgaaatttgtcgggaggttgc   | gatgtcaccatcacggagaattagg  |
| Chr.6  | RM20509 | 27,027,550 | caccgtcggagaaggactactgg   | gagcagccgtaggtgtcaaatgc    |
| Chr.6  | RM20591 | 28,016,785 | tcgtctgcgcgaatatttagagagg | atctgcatcggagtcagcaacg     |
| Chr.6  | RM340   | 28,599,181 | ggtaaatggacaatcctatggc    | gacaaatataagggcagtgctgc    |
| Chr.7  | RM5752  | 2,566,819  | ttgcaattaatcgcctcc        | gcagatcgattcgttagttc       |
| Chr.7  | RM481   | 2,874,465  | tagctagccgattgaatggc      | ctccacctcctatgttgttg       |
| Chr.7  | RM320   | 18,693,223 | caacgtgatcgaggatagatc     | ggatttgcttaccacagctc       |
| Chr.7  | RM11    | 19,256,914 | tctcctcttccccgatc         | atagcgggcgaggcttag         |
| Chr.7  | RM346   | 21,043,408 | cgagagagcccataactacg      | acaagacgacgaggaggagac      |
| Chr.7  | RM336   | 21,871,205 | cttacagagaaacggcatcg      | gctggtttgttcaggttcg        |
| Chr.7  | RM18    | 25,652,511 | ttcctctcatgagctccat       | gagtgcttggcgctgtac         |
| Chr.7  | RM3555  | 27,890,587 | tggaagtttctggcgatag       | tggttgactgaaaagtccc        |
| Chr.8  | RM152   | 682,963    | gaaaccaccacacctcacg       | ccgtagaccttctgaagtag       |
| Chr.8  | RM22804 | 11,313,822 | ggaccaacctaagcagtactcg    | ctgaagagcgcgatcatcaaatgtgg |
| Chr.8  | RM339   | 17,812,339 | gtaatcgatgctgtgggaag      | gagtcatgtgatagccgatatg     |
| Chr.8  | RM42    | 20,094,533 | atcctaccgctgacctgag       | tttggtctacgtggcgtaga       |
| Chr.8  | RM210   | 22,471,837 | tcacattcgggtggcattg       | cgaggatggtgttcacttg        |
| Chr.8  | RM23339 | 24,012,302 | acagcctatagctcacaccaaacc  | gaacacctccgtctccattgc      |
| Chr.8  | RM447   | 26,546,992 | cccttgctgtctcctctc        | acgggcttcttctcctctc        |
| Chr.8  | RM3761  | 27,106,702 | cctcaacaatagcaccaccc      | ctgcaagtctgcaagcacag       |
| Chr.8  | RM264   | 27,926,632 | gttgctgctactgctacttc      | gatccgtgtcgatgattagc       |
| Chr.9  | RM444   | 5,925,016  | gtccacctgcttaagcatc       | tgaagacatgttctgcagg        |
| Chr.9  | RM219   | 7,888,320  | cgtcggatgatgtaaagcct      | catatcggcattcgcctg         |
| Chr.9  | RM1896  | 11,767,349 | ggacagggtaaagtgttaga      | cctaagacctatcaactcca       |
| Chr.9  | RM278   | 19,320,020 | gtagtgagcctaacaataatc     | tcaactcagcatctctgtcc       |
| Chr.9  | RM107   | 20,068,688 | agatcgaagcatcgcgccgag     | actgcgtcctctgggttcccgg     |
| Chr.9  | RM201   | 20,174,289 | ctcgtttattacctacagtacc    | ctacctctttctagaccgata      |
| Chr.9  | RM205   | 22,720,624 | ctggttctgtatgggagcag      | ctggcccttcacgtttcagtg      |
| Chr.10 | RM7492  | 53,666     | agatgggtgccaagagcatg      | gtcacgtggcgatttaggag       |
| Chr.10 | RM6370  | 344,385    | ttgacaagccacacacag        | gtcctcccttggttcttcc        |
| Chr.10 | RM311   | 9,747,442  | tggtagtataggtactaaacat    | tcctatacacatacaaacatac     |
| Chr.10 | RM467   | 13,488,471 | ggtctctctctctctctctc      | ctcctgacaattcaactcgcg      |
| Chr.10 | RM5708  | 14,456,288 | aattagaacctctgaattg       | gtatttaaggtcacgtatcg       |

|        |         |            |                        |                          |
|--------|---------|------------|------------------------|--------------------------|
| Chr.10 | RM1375  | 16,644,899 | ctacacgcgcaaactctgtc   | atgaaggctaggtgcacc       |
| Chr.10 | RM5620  | 17,403,621 | tcgacttgaagcatcacacc   | tctgaaatgtcaagtgggcc     |
| Chr.10 | RM1125  | 17,771,479 | ggggccagagttttcttcag   | gtacgcgcagaaaatgagag     |
| Chr.10 | RM6704  | 17,934,263 | cacacattgcattacgaggg   | caggggcagcttgaatactg     |
| Chr.10 | RM258   | 18,014,265 | tgctgtatgtagctcgcacc   | tggcctttaaagctgtcgc      |
| Chr.10 | RM304   | 18,655,588 | tcaaaccggcacatataagac  | gatagggagctgaaggagatg    |
| Chr.10 | RM171   | 19,048,795 | aacgcgaggacacgtacttac  | acgagatacgtacgcctttg     |
| Chr.10 | RM590   | 23,043,156 | catctccgctctccatgc     | ggagttggggtcttgttcg      |
| Chr.11 | RM286   | 383,711    | ggcttcacgtttggcgac     | ccggattcacgagataaactc    |
| Chr.11 | RM332   | 2,840,211  | gcgaaggcgaaggtgaag     | catgagtgtatcactcaccc     |
| Chr.11 | RM167   | 4,073,024  | gatccagcgtgaggaacacgt  | agtccgaccacaaggtgcgtgtc  |
| Chr.11 | RM202   | 9,001,608  | cagattggagatgaagtcctcc | ccagcaagcatgtcaatgta     |
| Chr.11 | RM287   | 16,767,319 | ttccctgttaagagagaaatc  | gtgtatttggtaaagcaac      |
| Chr.11 | RM21    | 19,137,833 | acagtattccgtaggcacgg   | gctccatgaggggtgtagag     |
| Chr.11 | RM206   | 22,014,679 | cccattgcgtttaactattct  | cgttccatcgatccgatgg      |
| Chr.11 | RM254   | 23,729,167 | agccccgaataatccacct    | ctggaggagcatttggtagc     |
| Chr.11 | RM1233  | 26,534,048 | ttcgttttcttggttagtg    | attggctcctgaagaagg       |
| Chr.11 | RM224   | 27,673,353 | atcgatcgatcttcacgagg   | tgtataaaaaggcattcggg     |
| Chr.11 | RM144   | 28,281,693 | tgccctggcgcaaatttgatcc | gctagaggagatcagatggtagtc |
| Chr.12 | RM20A   | 970,538    | atcttgccttcgaggcat     | gaaacagaggcacatttcattg   |
| Chr.12 | RM19    | 2,432,080  | caaaaacagagcagatgac    | ctcaagatggacccaaga       |
| Chr.12 | RM247   | 3,185,384  | tagtgccgatcgatgtaacg   | catatggtttgacaaagcg      |
| Chr.12 | RM101   | 8,826,555  | gtgaatggtaagttaggtggc  | acacaacatgttcctcccatgc   |
| Chr.12 | RM28339 | 20,742,171 | gttcaagtcgatcggctctgg  | cgacgagaagaggtcgcagagg   |
| Chr.12 | RM270   | 25,002,547 | ggccgttggttctaaaatc    | tgcgcagtatcatcggcgag     |
| Chr.12 | RM2734  | 26,153,565 | gctctactgctctagagcaa   | gccacggattaatatatgaa     |
| Chr.12 | RM17    | 26,954,657 | tgccctgttattttctctctc  | ggtgatcctttccatttca      |
