# Supplementary figures and images for: Genetic Analysis of Novel Fertility Restoration Genes (qRf3 and qRf6) in Dongxiang Wild Rice Using GradedPool-Seq Mapping and QTL-Seq Correlation Analysis
Source: MDPI journal article supplement (doi:10.3390/ijms241914832), 2023-10-02

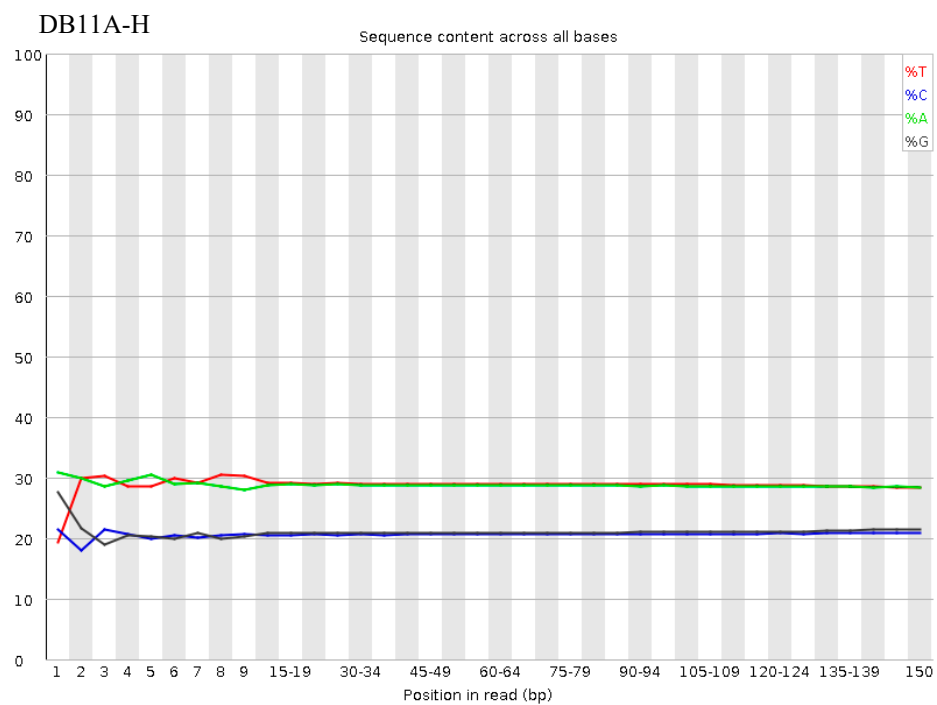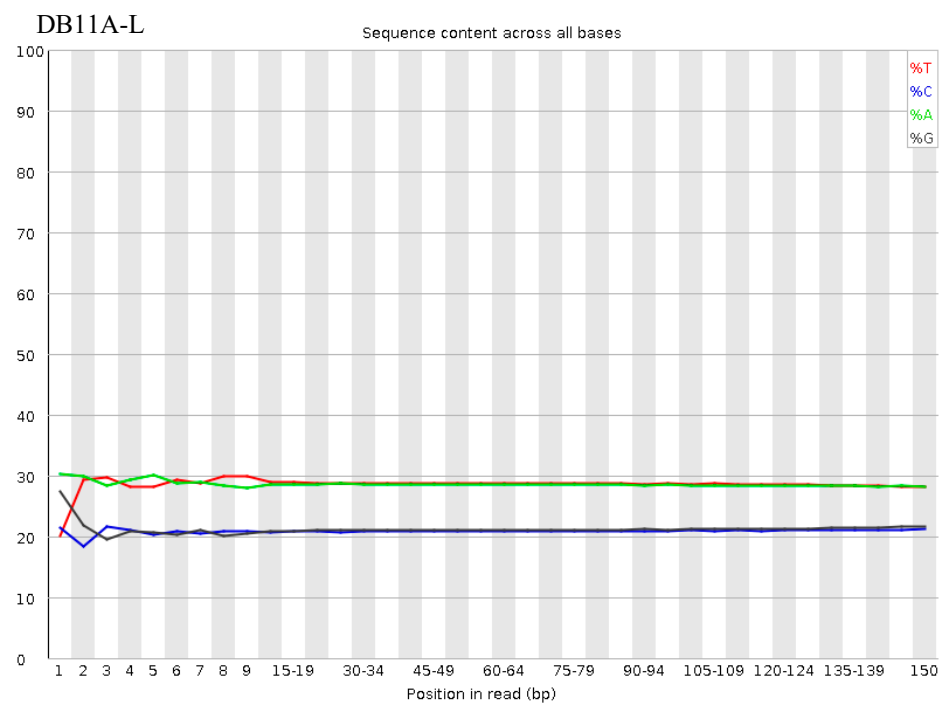

DB11A-M

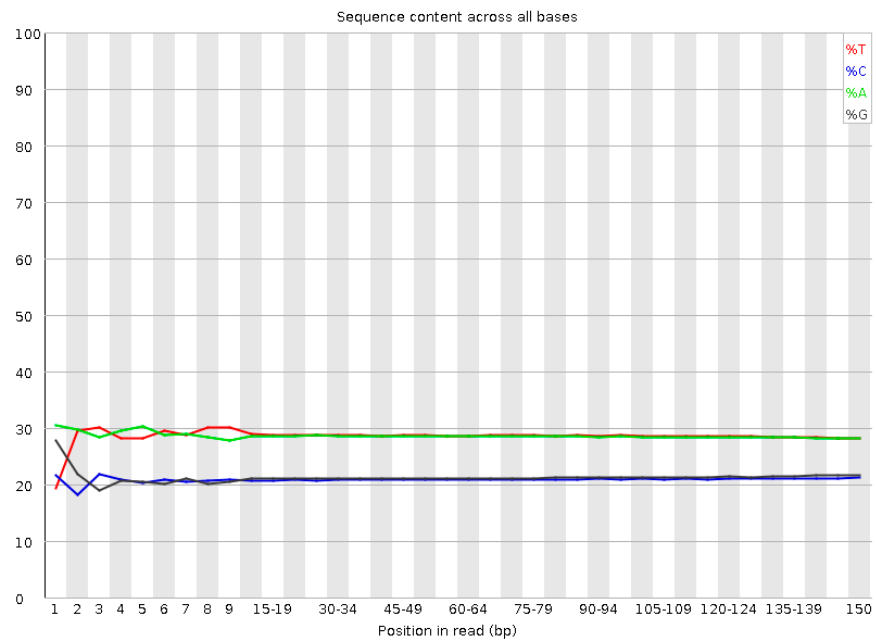

XB

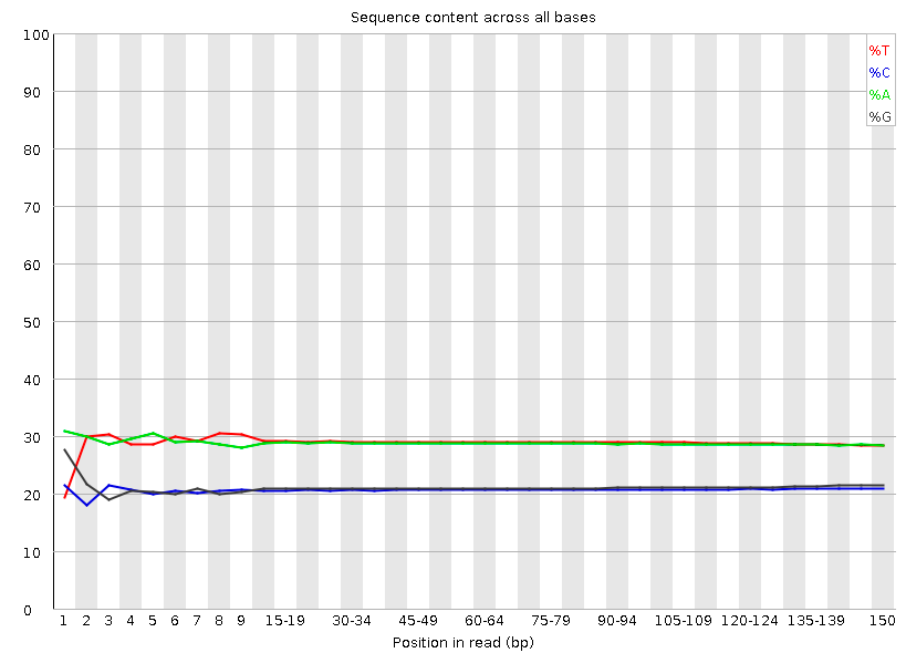

**Figure S1.** The distribution of sequencing bases in each sample.

Supplement: s1 [file s1]
